# Supplementary material
Source: MDPI journal article supplement (https://www.mdpi.com/2071-1050/15/22/16132)
Supplement: s1 [file s1]

**Table S1: Retail Workers Demographics**

| Description                                         | Mean | SD    | Min | Max |
|-----------------------------------------------------|------|-------|-----|-----|
| Age (years)                                         | 43.1 | 14.9  | 18  | 78  |
| Work experience in the retail sector (years)        | 14.8 | 6.698 | 1   | 55  |
| Years working at the specific retail business       | 8.5  | 5.781 | 1   | 42  |
| Average shift length, including paid breaks (hours) | 7.2  | 1.725 | 1   | 12  |

| Description                              | Categories                                                                                     | N   | % of sample (%<br>in ABS <sup>1</sup> ) |
|------------------------------------------|------------------------------------------------------------------------------------------------|-----|-----------------------------------------|
| Gender                                   | Female                                                                                         | 145 | 53.5%<br>(ABS 54.7%)                    |
|                                          | Male                                                                                           | 125 | 46.1%<br>(ABS 45.3%)                    |
|                                          | Non-binary/third gender                                                                        | 1   | 0.4%                                    |
| Retail worker category                   | Skilled                                                                                        | 225 | 83.6%                                   |
|                                          | Student worker                                                                                 | 29  | 10.8%                                   |
|                                          | Sabbatical year/working holidays                                                               | 5   | 1.9%                                    |
|                                          | Apprentice                                                                                     | 4   | 1.5%                                    |
|                                          | School dropout                                                                                 | 6   | 2.2%                                    |
| English as first/mother language         | Yes                                                                                            | 223 | 82.6%                                   |
|                                          | No                                                                                             | 47  | 17.4%                                   |
| Australian citizen or permanent resident | Yes                                                                                            | 259 | 95.6%                                   |
|                                          | No                                                                                             | 12  | 4.4%                                    |
| More than one job/employer               | No                                                                                             | 205 | 75.6%                                   |
|                                          | Yes                                                                                            | 66  | 24.4%                                   |
| Type of retail business                  | Global/national                                                                                | 153 | 56.7%                                   |
|                                          | Independent                                                                                    | 76  | 28.1%                                   |
|                                          | Regional                                                                                       | 41  | 15.2%                                   |
| Size of retail business                  | Large                                                                                          | 120 | 44.3%                                   |
|                                          | Medium                                                                                         | 79  | 29.2%                                   |
|                                          | Small                                                                                          | 72  | 26.6%                                   |
| Retail business group                    | Supermarket and grocery store or convenience store                                             | 53  | 19.6%                                   |
|                                          | Any other store (e.g., stationary, antique and used goods, flowers)                            | 40  | 14.8%                                   |
|                                          | Clothing store                                                                                 | 27  | 10.0%                                   |
|                                          | Department store                                                                               | 26  | 9.6%                                    |
|                                          | Liquor store                                                                                   | 23  | 8.5%                                    |
|                                          | Hardware, building and garden supplies store                                                   | 21  | 7.7%                                    |
|                                          | Electrical and electronic goods store                                                          | 19  | 7.0%                                    |
|                                          | Other recreational goods store (e.g., sports and camping, entertainment media, toys and games) | 16  | 5.9%                                    |
|                                          | Pharmaceutical, cosmetic and toiletry goods store                                              | 12  | 4.4%                                    |
|                                          | Other specialised food store (e.g., fresh meat, fish and poultry, fruits and vegetables)       | 12  | 4.4%                                    |
|                                          | Footwear and other personal accessory store                                                    | 11  | 4.1%                                    |
|                                          | Furniture, floor coverings, houseware and textile goods store                                  | 9   | 3.3%                                    |
| Location of work                         | New South Wales                                                                                | 77  | 28.5%                                   |
|                                          | Victoria                                                                                       | 72  | 26.7%                                   |
|                                          | Queensland                                                                                     | 62  | 23.0%                                   |
|                                          | South Australia                                                                                | 23  | 8.5%                                    |
|                                          | Western Australia                                                                              | 22  | 8.1%                                    |
|                                          | Tasmania                                                                                       | 7   | 2.6%                                    |
|                                          | Australian Capital Territory                                                                   | 5   | 1.9%                                    |
|                                          | Northern Territory                                                                             | 2   | 0.7%                                    |
| Type of employment                       | Full-time                                                                                      | 141 | 52.2%<br>(ABS 42.06%)                   |
|                                          | Part-time                                                                                      | 69  | 25.6%<br>ABS 19.29%)                    |

<sup>1</sup> <https://www.abs.gov.au/statistics/microdata-tablebuilder/tablebuilder>

Supplementary file to the article: Supporting sustainable futures in retail: an exploratory study on worker health, safety and wellbeing in Australia

| Description                                              | Categories                                                           | N   | % of sample (%<br>in ABS <sup>1</sup> ) |
|----------------------------------------------------------|----------------------------------------------------------------------|-----|-----------------------------------------|
|                                                          | Casual                                                               | 60  | 22.2%<br>(ABS 38.65%)                   |
| Regular split shifts                                     | No                                                                   | 242 | 89.3%                                   |
|                                                          | Yes                                                                  | 29  | 10.7%                                   |
| Work on Sundays/Public Holidays<br>twice a month or more | Yes                                                                  | 138 | 51.1%                                   |
|                                                          | No                                                                   | 132 | 48.9%                                   |
| Time of shifts                                           | Mornings/afternoons                                                  | 160 | 59.5%                                   |
|                                                          | Distributed                                                          | 53  | 19.7%                                   |
|                                                          | Evenings/early nights                                                | 31  | 11.5%                                   |
|                                                          | Rotation                                                             | 13  | 4.8%                                    |
|                                                          | Nights/very early mornings                                           | 12  | 4.5%                                    |
| Work alone or with others                                | With other staff members                                             | 207 | 77.0%                                   |
|                                                          | Alone                                                                | 62  | 23.0%                                   |
| Shifts reasonably predictable                            | Yes                                                                  | 215 | 79.3%<br>(ABS 74.8%)                    |
|                                                          | No                                                                   | 56  | 20.7%<br>(ABS 25.2%)                    |
| Supervisory responsibilities                             | Mixed                                                                | 132 | 48.7%                                   |
|                                                          | No                                                                   | 101 | 37.3%                                   |
|                                                          | Fully                                                                | 38  | 14.0%                                   |
| Nature of tasks                                          | Not office tasks                                                     | 130 | 48.1%                                   |
|                                                          | Office tasks within a store                                          | 91  | 33.7%                                   |
|                                                          | Office tasks in locations other than a store (e.g.,<br>headquarters) | 49  | 18.1%                                   |
| Job security                                             | Yes                                                                  | 214 | 79.0%<br>(ABS 87.3%)                    |
|                                                          | No                                                                   | 57  | 21.0%<br>(ABS 12.7%)                    |

**Table S2: Retail Managers/owners Demographics**

| Description                             | Mean | SD   | Min | Max |
|-----------------------------------------|------|------|-----|-----|
| Age (years)                             | 50.0 | 13.3 | 20  | 75  |
| Ownership (years)                       | 11.3 | 9.3  | 1   | 35  |
| Management work experience (years)      | 13.9 | 12.2 | 1   | 45  |
| Total work experience in retail (years) | 18.2 | 13.3 | 1   | 48  |

| Description                                                   | Categories                                                                                     | N  | Percentage |
|---------------------------------------------------------------|------------------------------------------------------------------------------------------------|----|------------|
| Role                                                          | Manager                                                                                        | 59 | 54.1%      |
|                                                               | (Co)owner                                                                                      | 50 | 45.9%      |
| Type of retail business                                       | Independent                                                                                    | 63 | 57.8%      |
|                                                               | Global/national                                                                                | 33 | 30.3%      |
|                                                               | Regional                                                                                       | 13 | 11.9%      |
| Size of retail business                                       | Small                                                                                          | 56 | 51.4%      |
|                                                               | Medium                                                                                         | 34 | 31.2%      |
|                                                               | Large                                                                                          | 19 | 17.4%      |
| Retail business group                                         | Any other store (e.g., stationary, antique and used goods, flowers)                            | 28 | 25.7%      |
|                                                               | Clothing store                                                                                 | 15 | 13.8%      |
|                                                               | Supermarket and grocery store or convenience store                                             | 11 | 10.1%      |
|                                                               | Other recreational goods store (e.g., sports and camping, entertainment media, toys and games) | 10 | 9.2%       |
|                                                               | Liquor store                                                                                   | 8  | 7.3%       |
|                                                               | Hardware, building and garden supplies store                                                   | 7  | 6.4%       |
|                                                               | Pharmaceutical, cosmetic and toiletry goods store                                              | 7  | 6.4%       |
|                                                               | Department store                                                                               | 6  | 5.5%       |
|                                                               | Electrical and electronic goods store                                                          | 4  | 3.7%       |
|                                                               | Other specialised food store (e.g., fresh meat, fish and poultry, fruits and vegetables)       | 4  | 3.7%       |
|                                                               | Footwear and other personal accessory store                                                    | 4  | 3.7%       |
|                                                               | Furniture, floor coverings, houseware and textile goods store                                  | 3  | 2.8%       |
|                                                               | Newspaper and book store                                                                       | 2  | 1.8%       |
|                                                               | Victoria                                                                                       | 52 | 47.7%      |
| Presence of retailer (multiple locations for national chains) | New South Wales                                                                                | 46 | 42.2%      |
|                                                               | Queensland                                                                                     | 44 | 40.4%      |
|                                                               | South Australia                                                                                | 28 | 25.7%      |
|                                                               | Western Australia                                                                              | 22 | 20.2%      |
|                                                               | Australian Capital Territory                                                                   | 20 | 18.3%      |
|                                                               | Tasmania                                                                                       | 19 | 17.4%      |
|                                                               | Northern Territory                                                                             | 14 | 12.8%      |
